# Supplementary material for: Expression of hemoglobin-α and β subunits in human vaginal epithelial cells and their functional significance
Source: PubMed Central journal article supplement (PMC5298339; doi:10.1371/journal.pone.0171084), 2017-02-08
Supplement: pone.0171084.s001.pdf [file pone.0171084.s001.pdf]

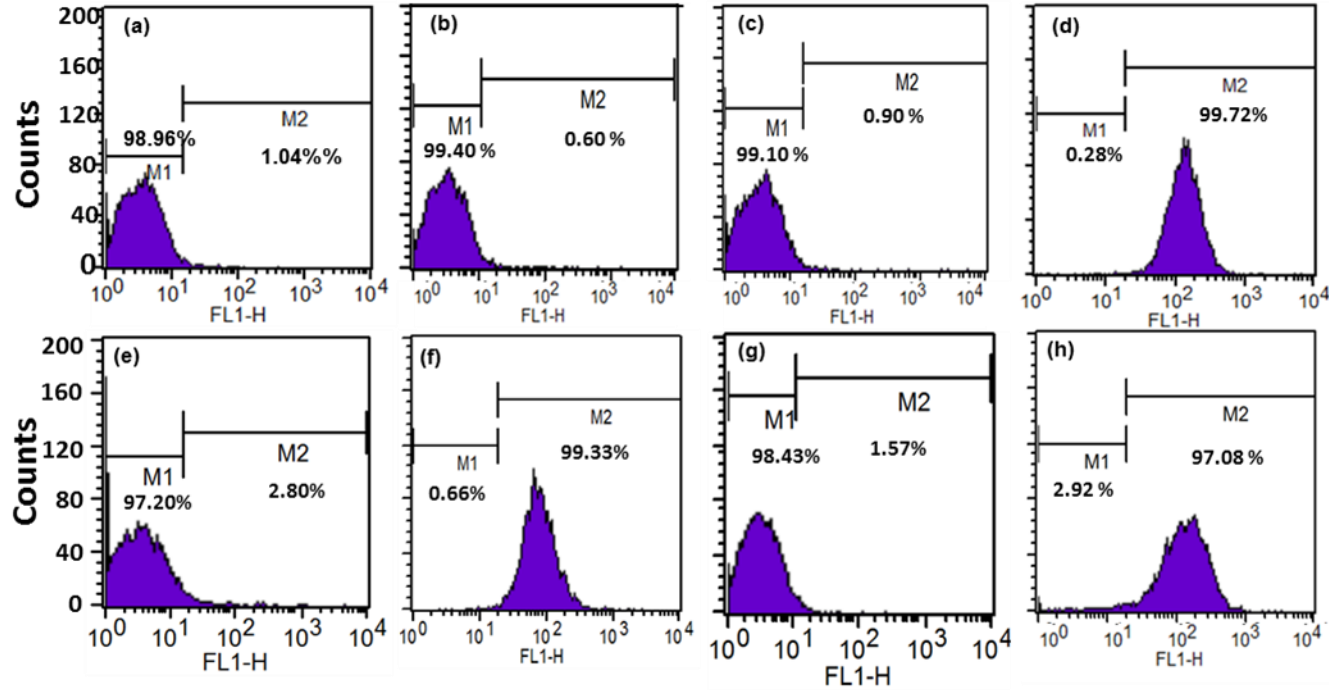

**Figure A.** Flow cytometry analysis of vimentin (a-d) and cytochrome expression in hPVECs (a,b,c,e,f,g) and HeLa cells (d) (positive control for vimentin). Cells were labelled with anti-vimentin and anti-cytochrome antibodies. Comparison of CK-13 and vimentin were made by comparing fluorescence in the M1 and M2 channels. hPVECs did not show vimentin expression (b) as compared to HeLa cells (d). Cytochrome expression was observed in hPVECs (f) and VK2/E6E7 cells (h). The figures shown are the representative pictures from three independent experiments are shown. Primary antibody controls for vimentin expression in hPVECs (a) and HeLa cells (c). Primary antibody controls for CK-13 expression in hPVECs (e) and VK2/E6E7 cells (g) are shown (FLI-H: log fluorescence intensity).

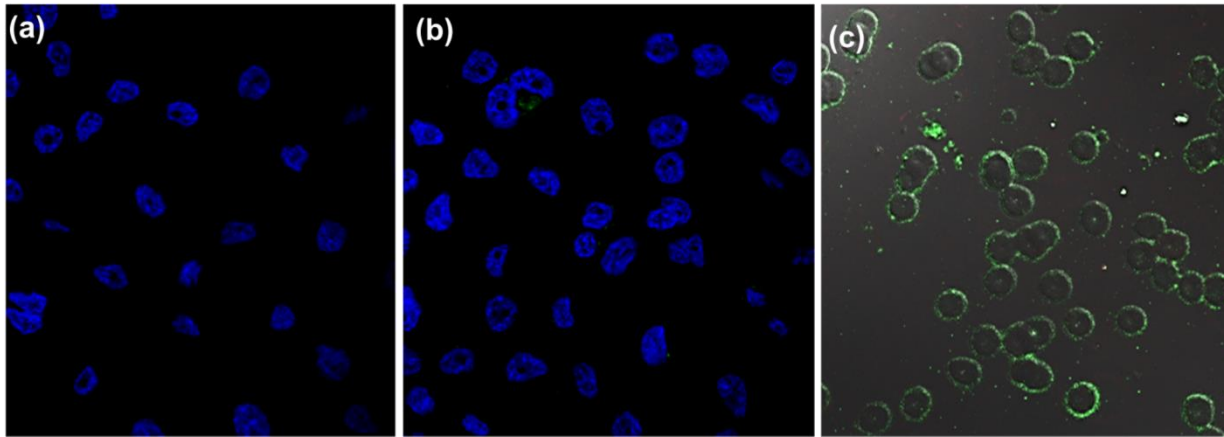

**Figure B.** Immunofluorescence localization of SLC4A-1 in hPVECs (a), VK2/E6E7 cells (b) and RBCs (c). SLC4A1 expression was seen on the cell membrane of RBCs (arrows). No expression was seen in hPVECs (a) and VK2/E6E7 cells (b). Nuclei of hPVECs (a), VK2/E6E7 cells stained with DAPI. Figure shown (Mag. 40X) is the representative picture from three independent experiments (a, b, c: FITC + DAPI merge).

```

clustalw.aln
CLUSTAL 2.1 multiple sequence alignment

gi|VK2/E6E7cells|_HBA_mRNA          -----
gi|NM_000558.4|_HBA1_mRNA          CATAAACCTGGCGCGCTCGCGCCGCGCACTCTTCTGGTCCCCACAGAC

gi|VK2/E6E7cells|_HBA_mRNA          -----
gi|NM_000558.4|_HBA1_mRNA          TCAGAGAGAAACCCACCATGGTGTCTCTCTGCCGACAAGACCAACGTCA

gi|VK2/E6E7cells|_HBA_mRNA          CCGCTGCCCGGTGTA-GGTCGGCGCGCACGCTGGCGAGTATGGTGGCGAG
gi|NM_000558.4|_HBA1_mRNA          AGCCCGCTGGGTAAAGGTCGGCGCCACGCTGGCGAGTATGGTGGCGAG
*****

gi|VK2/E6E7cells|_HBA_mRNA          GCCCTGGAGAGGATGTTCTGTCAATCCCACCACCAAGACCTACTTCCC
gi|NM_000558.4|_HBA1_mRNA          GCCCTGGAGAGGATGTTCTGTCTTCCCACCACCAAGACCTACTTCCC
*****

gi|VK2/E6E7cells|_HBA_mRNA          GCACCTCGACCTGAGCCACGGCTCTGCCAGGTTAAGGGCCACGGCAAGA
gi|NM_000558.4|_HBA1_mRNA          GCACCTCGACCTGAGCCACGGCTCTGCCAGGTTAAGGGCCACGGCAAGA
*****

gi|VK2/E6E7cells|_HBA_mRNA          AGGTGGCCGACGCGCTGACCAACGCCGTGGCGCACGTGGACGACATGCCC
gi|NM_000558.4|_HBA1_mRNA          AGTGGCCGACGCGCTGACCAACGCCGTGGCGCACGTGGACGACATGCCC
*****

gi|VK2/E6E7cells|_HBA_mRNA          AACGCGCTGTCCGCCCTGAGCGACCTGCACGCGCACAAGCTTCGGGTGGA
gi|NM_000558.4|_HBA1_mRNA          AACGCGCTGTCCGCCCTGAGCGACCTGCACGCGCACAAGCTTCGGGTGGA
*****

gi|VK2/E6E7cells|_HBA_mRNA          CCCGGTCAACTTCAAGCTCCTAAGCCACTGCCTGCTGGTGACCCCTGGCCG
gi|NM_000558.4|_HBA1_mRNA          CCCGGTCAACTTCAAGCTCCTAAGCCACTGCCTGCTGGTGACCCCTGGCCG
*****

gi|VK2/E6E7cells|_HBA_mRNA          CCCACCTCCCAGCGAGTTACCCCTGCGGTGCACGCCTCCCTGGACAAG
gi|NM_000558.4|_HBA1_mRNA          CCCACCTCCCAGCGAGTTACCCCTGCGGTGCACGCCTCCCTGGACAAG
*****

gi|VK2/E6E7cells|_HBA_mRNA          TTCTGGCTTCTGTGAGCACCCTGCTGACCTCCAAATACCGTTAAAT--
gi|NM_000558.4|_HBA1_mRNA          TTCTGGCTTCTGTGAGCACCCTGCTGACCTCCAAATACCGTTAAAGCTGG
*****

gi|VK2/E6E7cells|_HBA_mRNA          ---TACTTATCCACTCCAAAAGCAGCGAGAGAAGCTTTTA-----TT
gi|NM_000558.4|_HBA1_mRNA          AGCCTCGGTGGCCATGCTTCTTGCCTTGGGCTCCCCCAGCCCTCC
*****

gi|VK2/E6E7cells|_HBA_mRNA          TTATATATCTCCGCGCGGGCCGGGGAAAAACAAAAACCTTCT----
gi|NM_000558.4|_HBA1_mRNA          TCCCTTCTGCACCCGTACCCCGTGGTCTTTGAATAAAGTCTGAGTGG
*****

gi|VK2/E6E7cells|_HBA_mRNA          -----
gi|NM_000558.4|_HBA1_mRNA          GCGGCAAAAAAAAAAAAAAAAAAAAAA

```

CLUSTAL 2.1 Multiple Sequence Alignments

```

Sequence type explicitly set to DNA
Sequence format is Pearson
Sequence 1: gi|VK2/E6E7cells|_HBA_mRNA 482 bp
Sequence 2: gi|NM_000558.4|_HBA1_mRNA 627 bp
Start of Pairwise alignments
Aligning...

```

```

Sequences (1:2) Aligned. Score: 83.61
Guide tree file created: [clustalw.dnd]

```

```

There are 1 groups
Start of Multiple Alignment

```

```

Aligning...
Group 1: Sequences: 2      Score:8022
Alignment Score 3278

```

CLUSTAL-Alignment file created [clustalw.aln]

**Figure C.** Clustal W alignment of sequenced Hb- $\alpha$  PCR product. Hb- $\alpha$  (HBA1) sequence is having the accession number, NM\_000518.4

```

clustalw.aln
CLUSTAL 2.1 multiple sequence alignment

g1|VK2/E6E7cells|_HBB_mRNA
g1|ref|NM_000518.4|_HBB_mRNA
-----
ATGTTGCTTCTGACACAACCTGTGTTCACTAGCAACCTCAAACAGACACC

g1|VK2/E6E7cells|_HBB_mRNA
g1|ref|NM_000518.4|_HBB_mRNA
-----
CTACGTTTGCC--GTCGGG
ATGGTGCACTGACTCCTGAGGAGAAGTCTGCCGTTACTGCCCTGTGGGG

g1|VK2/E6E7cells|_HBB_mRNA
g1|ref|NM_000518.4|_HBB_mRNA
-----
CAAGT--GACGTGGATGA-GTTGGTGGTGAAGCCCTGGGCAGGCTGCTGG
CAAGGTGAACGTGGATGAAGTTGGTGGTGAAGCCCTGGGCAGGCTGCTGG
*****

g1|VK2/E6E7cells|_HBB_mRNA
g1|ref|NM_000518.4|_HBB_mRNA
-----
TGGTCTACC-TTGGACCAGAGGTTCTTTGAGTCTTTGGGGATCTGTCC
TGGTCTACCCTTGGACCAGAGGTTCTTTGAGTCTTTGGGGATCTGTCC

g1|VK2/E6E7cells|_HBB_mRNA
g1|ref|NM_000518.4|_HBB_mRNA
-----
ACTCCTGATGCTGTTATGGGCAACCTAAGGTGAAGGCTCATGGCAAGAA
ACTCCTGATGCTGTTATGGGCAACCTAAGGTGAAGGCTCATGGCAAGAA
*****

g1|VK2/E6E7cells|_HBB_mRNA
g1|ref|NM_000518.4|_HBB_mRNA
-----
AGTGCTCGGTGCCITTAGTGATGGCTCTCTCACCTGGACAACCTCAAGG
AGTGCTCGGTGCCITTAGTGATGGCTCTCTCACCTGGACAACCTCAAGG
*****

g1|VK2/E6E7cells|_HBB_mRNA
g1|ref|NM_000518.4|_HBB_mRNA
-----
GCACCTTTGCCACACTGAGTGAGCTGCACTGTGACAAGCTGCACGTGGAT
GCACCTTTGCCACACTGAGTGAGCTGCACTGTGACAAGCTGCACGTGGAT
*****

g1|VK2/E6E7cells|_HBB_mRNA
g1|ref|NM_000518.4|_HBB_mRNA
-----
CCTGAGAACTTCAGGCTCCTGGGCAACGTGCTGGTCTGTGTGCTGGCCCA
CCTGAGAACTTCAGGCTCCTGGGCAACGTGCTGGTCTGTGTGCTGGCCCA
*****

g1|VK2/E6E7cells|_HBB_mRNA
g1|ref|NM_000518.4|_HBB_mRNA
-----
TCACITTTGGCAAAGAATTACACCCACCAAGTGCAGGCTGCCTATCAGAAA
TCACITTTGGCAAAGAATTACACCCACCAAGTGCAGGCTGCCTATCAGAAA
*****

g1|VK2/E6E7cells|_HBB_mRNA
g1|ref|NM_000518.4|_HBB_mRNA
-----
TGGTGGCTGGTGGCTAATGCCCTGGCCCAAGATCACTAAAGGCAC
TGGTGGCTGGTGGCTAATGCCCTGGCCCAAGATCACTAAAGGCAC
-----

g1|VK2/E6E7cells|_HBB_mRNA
g1|ref|NM_000518.4|_HBB_mRNA
-----
CGAGCACTTCTTGCCATGAGCCTTACCTTAGGGTTGC-----CCATA
-GCTCGCTTCTTGCTGTCCAATTTCTATTAAAGGTTCTTTGTTCCCTA
*****

g1|VK2/E6E7cells|_HBB_mRNA
g1|ref|NM_000518.4|_HBB_mRNA
-----
A--CAGCATCAGGAGTGGACAGATCTTTAAGGACTCAAAGAACCT--
AGTCCAACTACTAAACTGGGGATATTATGAAGGCTTGAAGCATCTGGA
*****

g1|VK2/E6E7cells|_HBB_mRNA
g1|ref|NM_000518.4|_HBB_mRNA
-----
CTGGGTCGAAGGTTAGACCACCAAGCAGCCTGCC
TTCTGCCTAATAAAAAACATTTATTTTCATTGC-
*****

```

```

CLUSTAL 2.1 Multiple Sequence Alignments

Sequence type explicitly set to DNA
Sequence format is Pearson
Sequence 1: g1|VK2/E6E7cells|_HBB_mRNA      535 bp
Sequence 2: g1|ref|NM_000518.4|_HBB_mRNA    626 bp
Start of Pairwise alignments
Aligning...

Sequences (1:2) Aligned. Score: 74.0187
Guide tree file created: [clustalw.dnd]

There are 1 groups
Start of Multiple Alignment

Aligning...
Group 1: Sequences: 2      Score:8561
Alignment Score 3174

CLUSTAL-Alignment file created [clustalw.aln]

```

**Figure D.** Clustal W alignment of sequenced Hb-β PCR product. Hb-β (HBB) sequence is having the accession number, NM\_000518.4

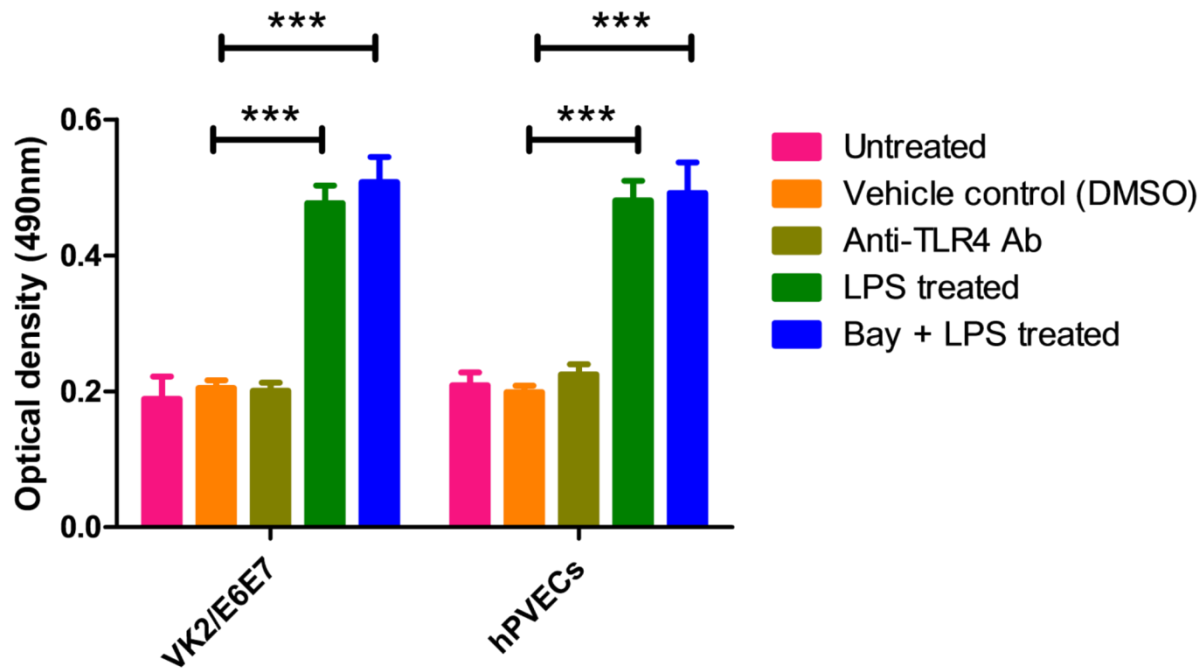

**Figure E.** TLR4 levels in untreated control, DMSO treated control, LPS stimulated and Bay 11 7082 treated hPVECs and VK2/E6E7 cells analysed by ELISA. Cells were seeded at a density of  $10^6$ /well in a 24-well plate and induced with LPS ( $10 \mu\text{g/ml}$  for 6 hrs) or Bay 11-0782 ( $5\mu\text{M}$  for 24 hrs) . Expression of TLR4 was up-regulated in LPS-induced cells. Bay 11-7082 treated cells induced with LPS, the levels of TLR4 were up-regulated. In cells treated with anti-TLR4 antibody, the levels of TLR4 were at par with the controls. Values represent the mean  $\pm$  SD of three experiments performed on different days. All the values are statistically significant (\*\*\*) $p < 0.001$  over the controls).

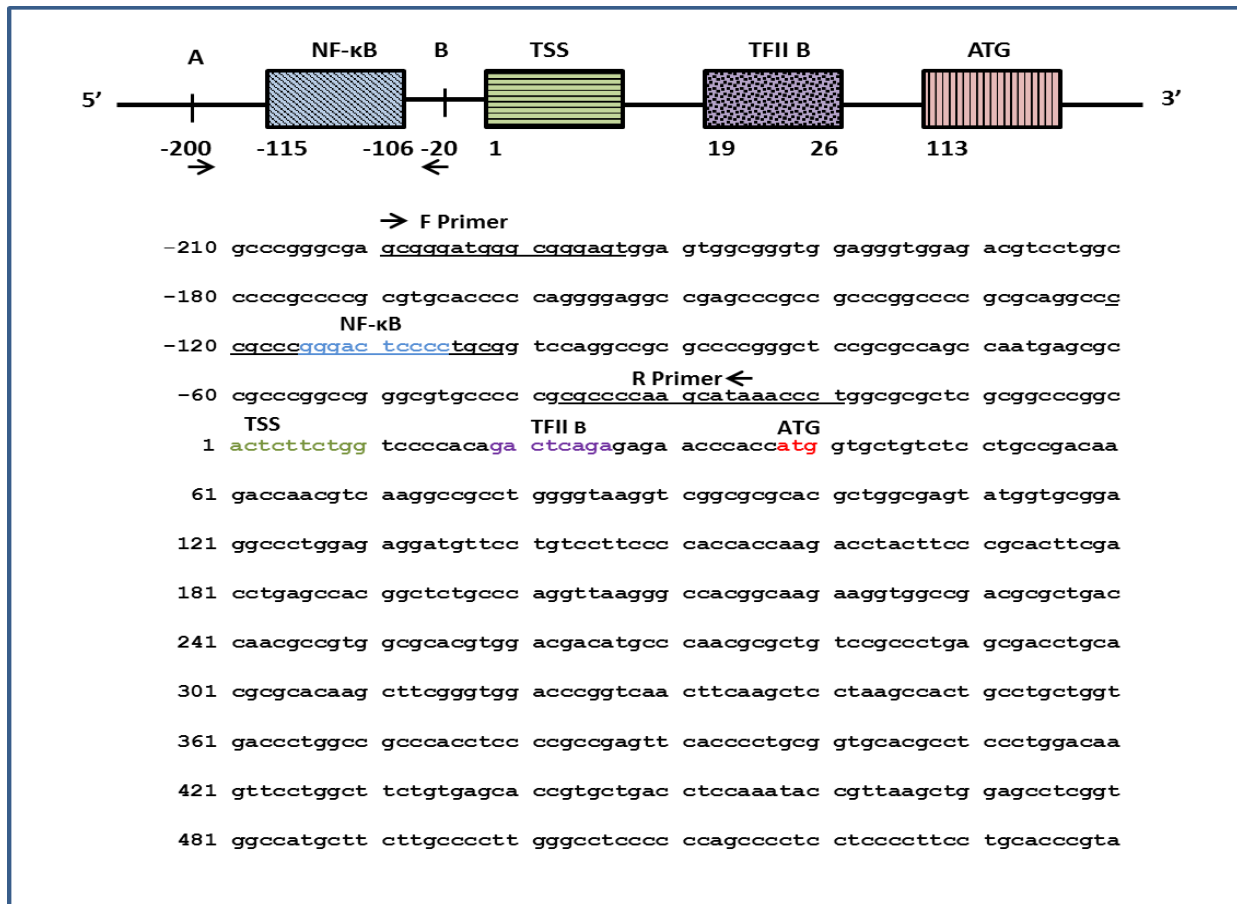

**Figure F. Schematic representation of the human Hb- $\alpha$  promoter upstream region (-210 to +540) (A).** The -5' (A) and -3' (B) primers used for the Hb- $\alpha$  promoter amplification are shown. TSS, NF- $\kappa$ B, TFIIB and ATG sites are indicated. (TSS: transcription start site, TFIIB: Transcription factor binding site, NF- $\kappa$ B: Nuclear factor kappaB). NF- $\kappa$ B primers used in ChIP assay are indicated (arrows).

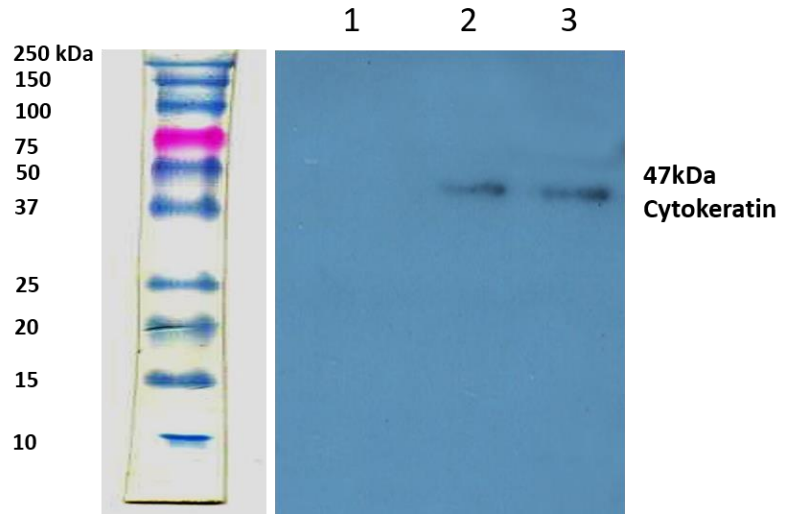

**Figure G. Western blot (Uncut Fig-4a)**

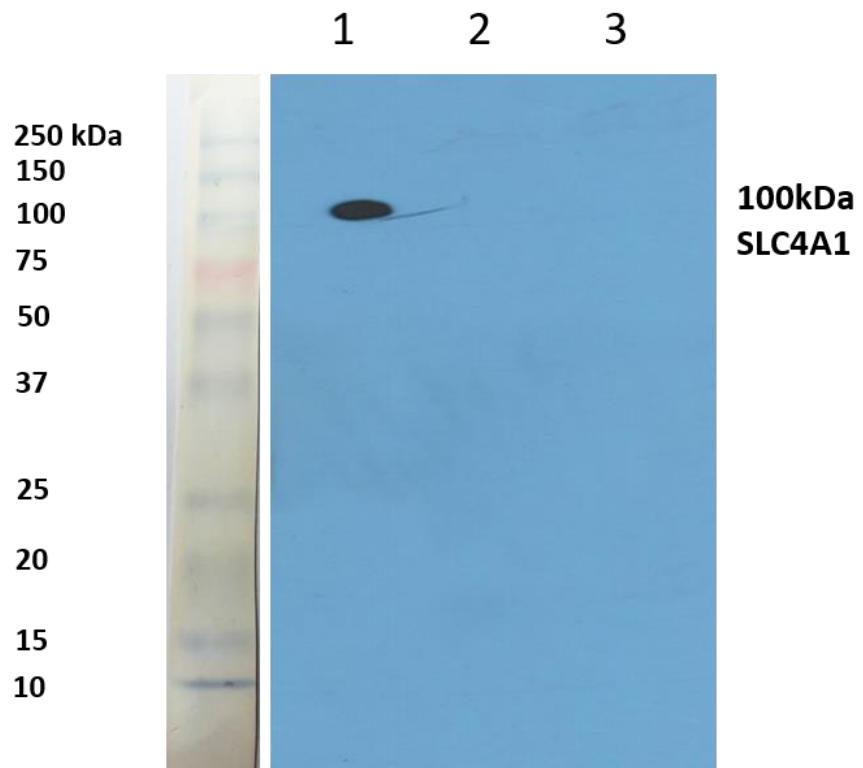

**Figure H. Western blot (Uncut Fig4b)**



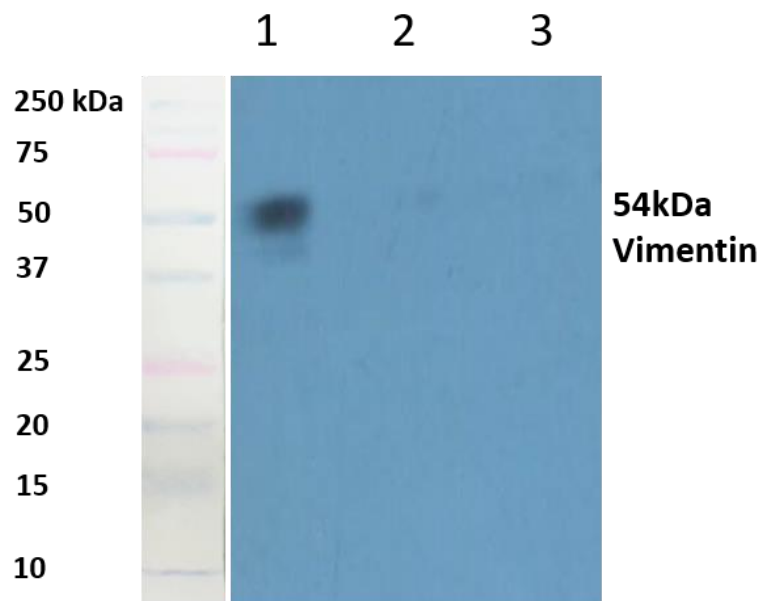

**Figure I. Western blot (Uncut Fig4c)**

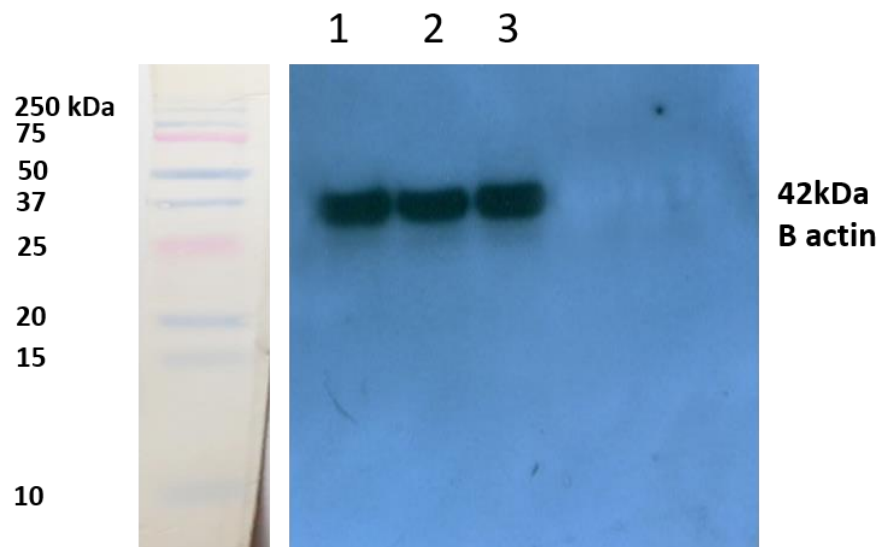

**Figure J. Western blot (Uncut Fig4d)**

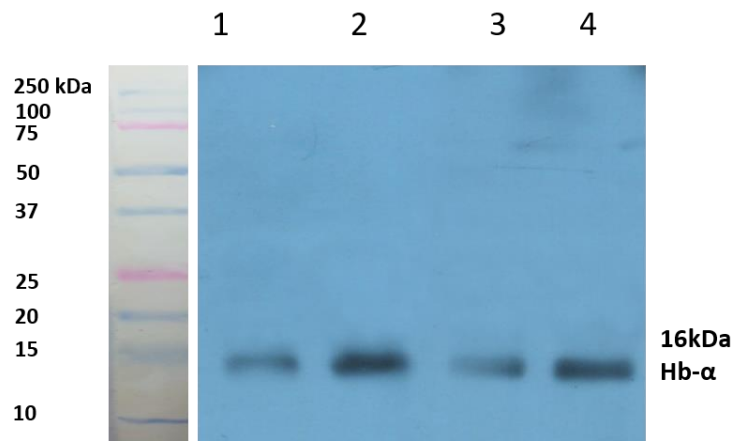

**Figure K. Western blot (Uncut Fig7a)**

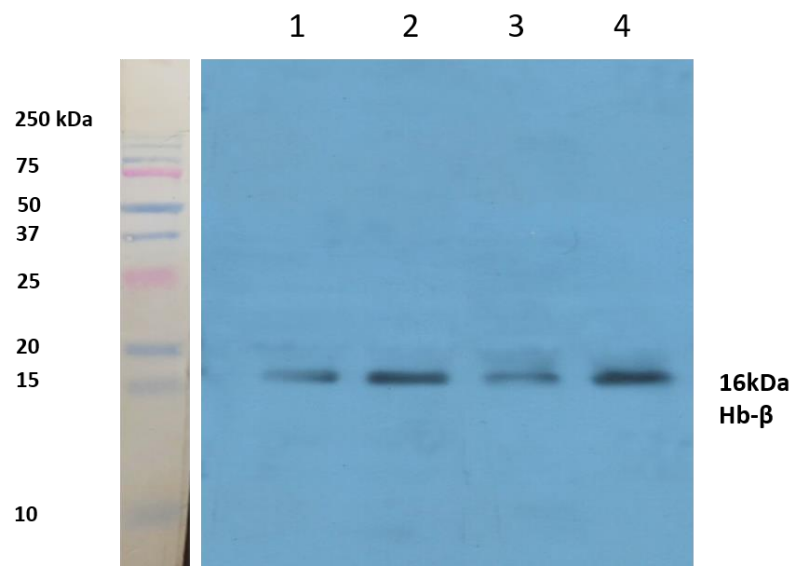

**Figure L. Western blot (Uncut Fig7b)**

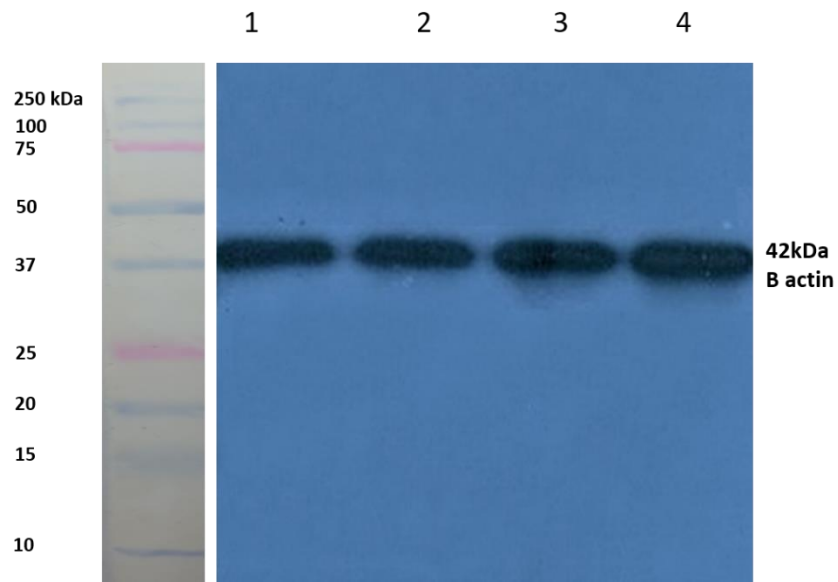

**Figure M. Western blot (Uncut Fig7c)**

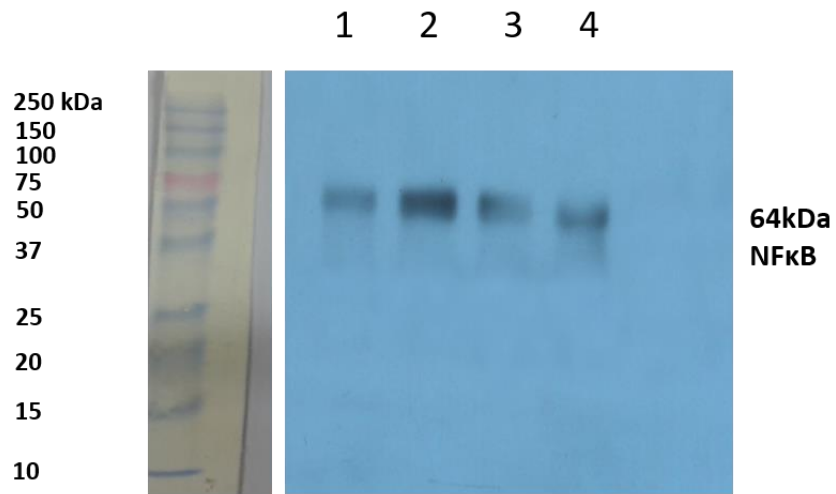

**Figure N. Western blot (Uncut Fig-9b, i)**

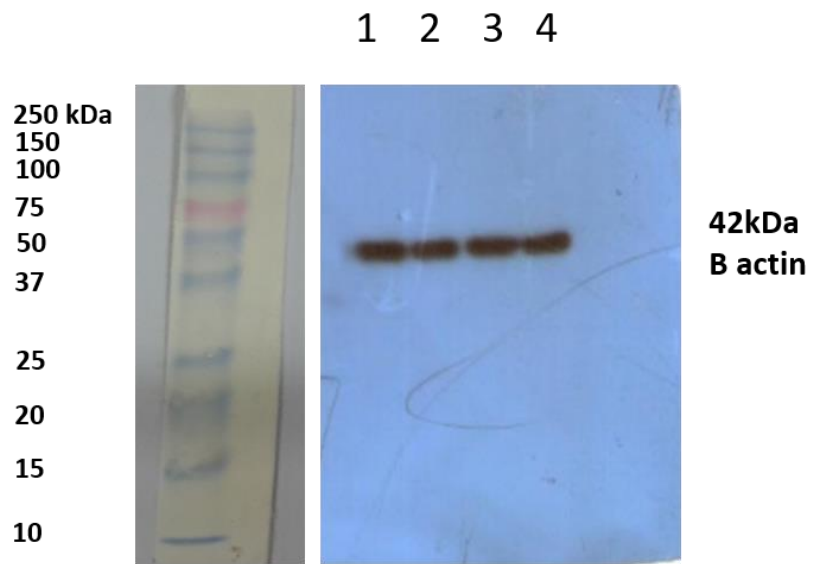

**Figure O. Western blot (Uncut Fig9b, ii)**

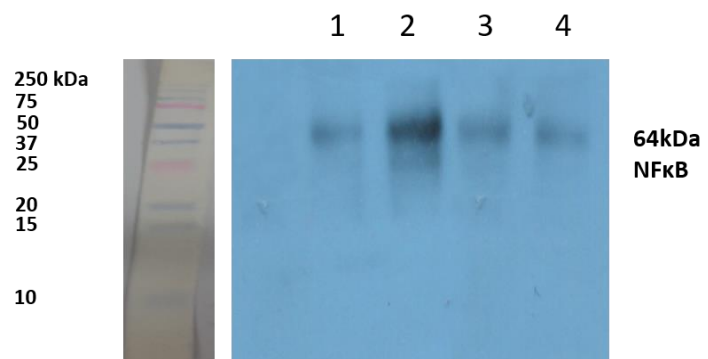

**Figure P. Western blot (Uncut Fig9b, iii)**



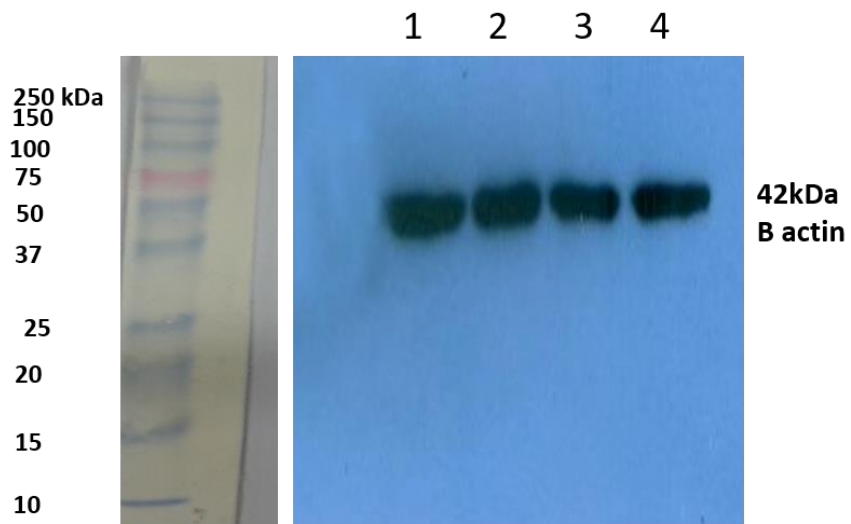

**Figure Q. Western blot (Uncut Fig9b, iv)**

**Table A. Densitometry values of Fig5B.**

| Parameter   | hPVECs (Untreated) |       |       |       |       |       | hPVECs (LPS treated) |       |        |       |      |       | VK2/E6E7 (Untreated) |       |       |       |       |       | VK2/E6E7 (LPS treated) |       |       |       |       |       |
|-------------|--------------------|-------|-------|-------|-------|-------|----------------------|-------|--------|-------|------|-------|----------------------|-------|-------|-------|-------|-------|------------------------|-------|-------|-------|-------|-------|
|             | Hb- $\alpha$       | 0.239 | 0.229 | 0.259 | 0.269 | 0.301 | 0.291                | 0.512 | 0.0489 | 0.506 | 0.53 | 0.562 | 0.586                | 0.197 | 0.203 | 0.195 | 0.189 | 0.18  | 0.173                  | 0.871 | 0.888 | 0.813 | 0.227 | 0.816 |
| Hb- $\beta$ | 0.707              | 0.663 | 0.745 | 0.759 | 0.83  | 0.716 | 0.888                | 0.912 | 0.967  | 0.943 | 1.04 | 0.944 | 0.218                | 0.224 | 0.217 | 0.209 | 0.273 | 0.265 | 0.96                   | 0.86  | 0.947 | 0.938 | 0.97  | 982   |

**Table B. Fold change values of Fig6.**

| Parameter   | hPVECs (Untreated) |   |   |   |   |   | hPVECs (LPS treated) |       |       |       |       |       | VK2/E6E7 (Untreated) |   |   |   |   |   | VK2/E6E7 (LPS treated) |       |       |       |       |      |
|-------------|--------------------|---|---|---|---|---|----------------------|-------|-------|-------|-------|-------|----------------------|---|---|---|---|---|------------------------|-------|-------|-------|-------|------|
|             | Hb- $\alpha$       | 1 | 1 | 1 | 1 | 1 | 1                    | 2.02  | 2.033 | 1.955 | 1.879 | 2.207 | 2.202                | 1 | 1 | 1 | 1 | 1 | 1                      | 2.399 | 2.158 | 2.36  | 2.012 | 2.08 |
| Hb- $\beta$ | 1                  | 1 | 1 | 1 | 1 | 1 | 2.206                | 2.166 | 2.201 | 2.339 | 2.541 | 2.171 | 1                    | 1 | 1 | 1 | 1 | 1 | 2.49                   | 2.127 | 2.319 | 2.142 | 2.598 | 2.31 |

**Table C. Densitometry values of Fig7D.**

| Parameter   | hPVECs (Untreated) |       |       |      |      |      | hPVECs (LPS treated) |      |       |       |       |      | VK2/E6E7 (Untreated) |       |       |      |      |      | VK2/E6E7 (LPS treated) |      |      |      |      |      |
|-------------|--------------------|-------|-------|------|------|------|----------------------|------|-------|-------|-------|------|----------------------|-------|-------|------|------|------|------------------------|------|------|------|------|------|
|             | Hb- $\alpha$       | 0.132 | 0.148 | 0.21 | 0.2  | 0.24 | 0.28                 | 0.71 | 0.82  | 0.761 | 0.839 | 0.81 | 0.88                 | 0.148 | 0.132 | 0.21 | 0.19 | 0.25 | 0.27                   | 0.88 | 0.68 | 0.7  | 0.71 | 0.89 |
| Hb- $\beta$ | 0.27               | 0.168 | 0.23  | 0.27 | 0.33 | 0.29 | 0.66                 | 0.68 | 0.761 | 0.765 | 0.8   | 0.78 | 0.175                | 0.185 | 0.23  | 0.27 | 0.34 | 0.24 | 0.76                   | 0.78 | 0.85 | 0.75 | 0.87 | 0.85 |

**Table D. ELISA values of Graph 9A.**

| Parameter              | Control Untreated |       |       |       |       |       | LPS treated |       |       |       |       |       | BAY treated |       |       |       |       |       |
|------------------------|-------------------|-------|-------|-------|-------|-------|-------------|-------|-------|-------|-------|-------|-------------|-------|-------|-------|-------|-------|
|                        |                   |       |       |       |       |       |             |       |       |       |       |       |             |       |       |       |       |       |
| p65 NF-kB (hPVECs)     | 0.196             | 0.176 | 0.193 | 0.191 | 0.184 | 0.225 | 0.449       | 0.377 | 0.431 | 0.423 | 0.448 | 0.434 | 0.191       | 0.157 | 0.186 | 0.192 | 0.173 | 0.219 |
| Total NF-kB (hPVECs)   | 0.222             | 251   | 0.222 | 0.262 | 0.259 | 0.25  | 0.427       | 0.436 | 0.445 | 0.443 | 0.453 | 0.451 | 0.202       | 0.233 | 0.189 | 0.25  | 0.227 | 0.237 |
| p65 NF-kB (VK2/E6E7)   | 0.194             | 0.192 | 0.189 | 0.213 | 0.226 | 0.205 | 0.433       | 0.44  | 0.411 | 0.478 | 0.422 | 0.291 | 0.143       | 0.141 | 0.153 | 0.147 | 0.168 | 0.166 |
| Total NF-kB (VK2/E6E7) | 0.202             | 0.22  | 0.202 | 0.245 | 0.206 | 0.268 | 0.46        | 0.479 | 0.434 | 0.461 | 0.475 | 0.451 | 0.189       | 0.222 | 0.204 | 0.226 | 0.212 | 0.246 |

**Table E. Densitometry values of Fig9C.**

| Cells    | Untreated |       |       |       |       |       | LPS treated |       |      |      |       |      | Bay treated |       |       |       |       |       | Bay + LPS treated |       |       |       |       |       |
|----------|-----------|-------|-------|-------|-------|-------|-------------|-------|------|------|-------|------|-------------|-------|-------|-------|-------|-------|-------------------|-------|-------|-------|-------|-------|
|          |           |       |       |       |       |       |             |       |      |      |       |      |             |       |       |       |       |       |                   |       |       |       |       |       |
| hPVECs   | 0.461     | 0.385 | 0.421 | 0.44  | 0.45  | 0.498 | 0.888       | 0.846 | 0.76 | 0.98 | 0.936 | 0.95 | 0.237       | 0.236 | 0.289 | 0.271 | 0.33  | 0.25  | 0.291             | 0.249 | 0.25  | 0.33  | 0.23  | 0.19  |
| VK2/E6E7 | 0.33      | 0.27  | 0.257 | 0.383 | 0.269 | 0.411 | 0.81        | 0.83  | 0.91 | 0.87 | 0.88  | 0.76 | 0.12        | 0.1   | 0.21  | 0.17  | 0.137 | 0.123 | 0.112             | 0.116 | 0.174 | 0.188 | 0.137 | 0.127 |

**Table F. Densitometry values of Fig10B**

| Cells    | Untreated |       |       |       |       |       | Vehicle Control (DMSO) |       |       |       |       |       | Anti TLR4 Ab |      |       |       |       |      | LPS treated |       |       |       |       |       |
|----------|-----------|-------|-------|-------|-------|-------|------------------------|-------|-------|-------|-------|-------|--------------|------|-------|-------|-------|------|-------------|-------|-------|-------|-------|-------|
|          |           |       |       |       |       |       |                        |       |       |       |       |       |              |      |       |       |       |      |             |       |       |       |       |       |
| VK2/E6E7 | 0.051     | 0.059 | 0.055 | 0.065 | 0.047 | 0.037 | 0.067                  | 0.055 | 0.051 | 0.059 | 0.075 | 0.067 | 0.061        | 0.77 | 0.071 | 0.072 | 0.066 | 0.09 | 0.37        | 0.398 | 0.371 | 0.421 | 0.381 | 0.399 |
| hPVECs   | 0.117     | 0.103 | 0.116 | 0.12  | 0.112 | 0.13  | 0.117                  | 0.113 | 0.102 | 0.136 | 0.118 | 0.128 | 0.132        | 0.16 | 0.154 | 0.172 | 0.152 | 0.15 | 0.44        | 0.448 | 0.44  | 0.466 | 0.252 | 0.472 |

**Table G. ELISA values of Graph 11A.**

| Time (Hrs) | Control hPVECs |     |     |     |     |     | LPS hPVECs |     |     |     |     |     | Control VK2/E6E7 |     |     |     |     |     | LPS VK2/E6E7 |     |     |     |     |     |
|------------|----------------|-----|-----|-----|-----|-----|------------|-----|-----|-----|-----|-----|------------------|-----|-----|-----|-----|-----|--------------|-----|-----|-----|-----|-----|
|            |                |     |     |     |     |     |            |     |     |     |     |     |                  |     |     |     |     |     |              |     |     |     |     |     |
| 6          | 212            | 264 | 251 | 235 | 301 | 267 | 333        | 321 | 389 | 413 | 477 | 473 | 222              | 214 | 243 | 257 | 281 | 321 | 381          | 371 | 421 | 447 | 503 | 481 |
| 12         | 211            | 207 | 250 | 248 | 265 | 313 | 499        | 467 | 570 | 556 | 666 | 620 | 169              | 149 | 267 | 265 | 370 | 376 | 497          | 505 | 572 | 582 | 650 | 658 |
| 24         | 202            | 242 | 231 | 249 | 302 | 270 | 331        | 355 | 420 | 402 | 483 | 475 | 162              | 174 | 244 | 238 | 304 | 324 | 347          | 341 | 401 | 445 | 479 | 525 |

**Table H. ELISA values of Graph 11B.**

| Time (Hrs) | Control hPVECs |    |    |    |    |    | LPS hPVECs |    |    |    |    |    | Control VK2/E6E7 |    |    |    |    |    | LPS VK2/E6E7 |    |    |    |    |    |
|------------|----------------|----|----|----|----|----|------------|----|----|----|----|----|------------------|----|----|----|----|----|--------------|----|----|----|----|----|
|            |                |    |    |    |    |    |            |    |    |    |    |    |                  |    |    |    |    |    |              |    |    |    |    |    |
| 6          | 37             | 45 | 43 | 47 | 47 | 51 | 30         | 28 | 38 | 30 | 38 | 40 | 38               | 40 | 43 | 35 | 48 | 50 | 33           | 35 | 39 | 37 | 44 | 40 |
| 12         | 47             | 39 | 56 | 42 | 54 | 56 | 29         | 27 | 31 | 33 | 37 | 35 | 33               | 39 | 43 | 44 | 47 | 53 | 26           | 30 | 33 | 35 | 30 | 41 |
| 24         | 51             | 39 | 51 | 47 | 59 | 47 | 29         | 23 | 35 | 27 | 39 | 33 | 37               | 38 | 41 | 47 | 51 | 52 | 24           | 28 | 32 | 30 | 37 | 36 |

**Table I. Densitometry values of Fig12B**

| Parameter    | hPVECs (Untreated) |       |       |       |       |       | hPVECs (Bay treated) |       |       |       |       |       | VK2/E6E7 (Untreated) |       |       |       |       |       | VK2/E6E7 (Bay treated) |       |       |       |       |       |
|--------------|--------------------|-------|-------|-------|-------|-------|----------------------|-------|-------|-------|-------|-------|----------------------|-------|-------|-------|-------|-------|------------------------|-------|-------|-------|-------|-------|
|              |                    |       |       |       |       |       |                      |       |       |       |       |       |                      |       |       |       |       |       |                        |       |       |       |       |       |
| Hb- $\alpha$ | 0.423              | 0.401 | 0.42  | 0.442 | 0.451 | 0.457 | 0.137                | 0.151 | 0.165 | 0.181 | 0.206 | 0.208 | 0.524                | 0.526 | 539   | 0.523 | 0.538 | 0.554 | 0.223                  | 0.227 | 0.257 | 0.249 | 0.281 | 0.289 |
| Hb- $\beta$  | 0.411              | 0.437 | 0.477 | 0.431 | 0.478 | 0.494 | 0.152                | 0.174 | 0.187 | 0.177 | 0.199 | 0.211 | 0.443                | 0.419 | 0.445 | 0.439 | 0.441 | 0.477 | 0.231                  | 0.215 | 0.198 | 0.202 | 0.188 | 0.18  |

**Table J. Densitometry values of Fig13B**

| Parameter | hPVECs (Untreated) |      |      |      |      |      | hPVECs ( LPS treated) |      |      |      |      |      | VK2/E6E7 (Untreated) |     |      |      |      |      | VK2/E6E7 (LPS treated) |      |      |      |      |      |
|-----------|--------------------|------|------|------|------|------|-----------------------|------|------|------|------|------|----------------------|-----|------|------|------|------|------------------------|------|------|------|------|------|
|           |                    |      |      |      |      |      |                       |      |      |      |      |      |                      |     |      |      |      |      |                        |      |      |      |      |      |
| hBD-1     | 0.44               | 0.38 | 0.42 | 0.44 | 0.49 | 0.43 | 0.93                  | 0.79 | 0.87 | 0.95 | 0.95 | 0.93 | 0.31                 | 0.3 | 0.35 | 0.33 | 0.37 | 0.35 | 0.81                   | 0.75 | 0.78 | 0.82 | 0.84 | 0.82 |
